# Supplementary material for: Clinical Presentation and Serologic Response during a Rabies Epizootic in Captive Common Vampire Bats (Desmodus rotundus)
Source: MDPI journal article supplement (doi:10.3390/tropicalmed5010034), 2020-03-01

### AUGUST 2018

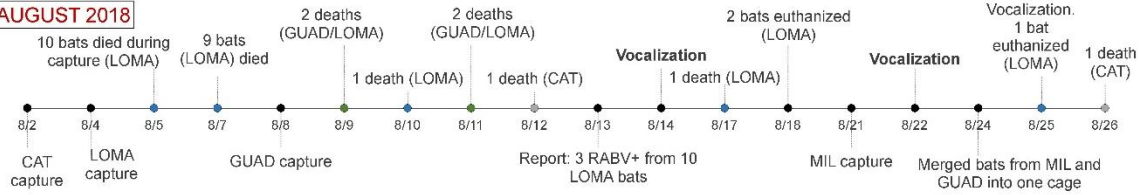

### SEPTEMBER 2018

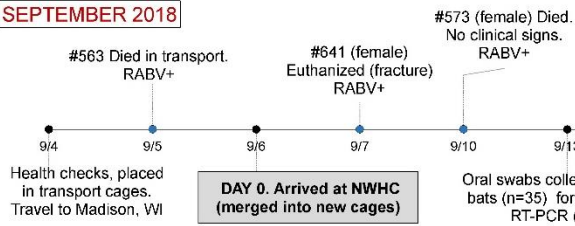

### OCTOBER/NOVEMBER 2018

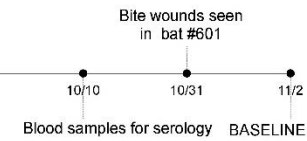

### DECEMBER 2018

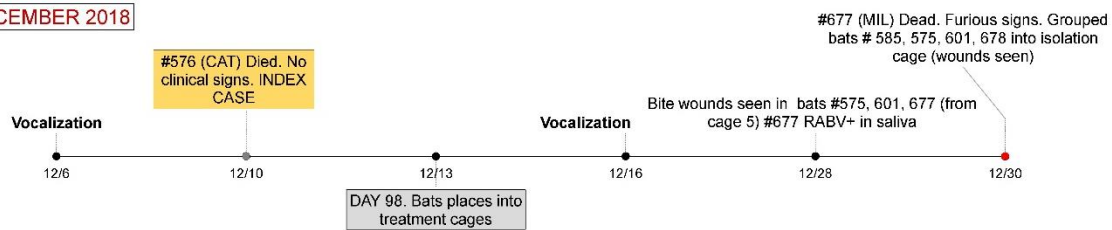

### JANUARY 2019

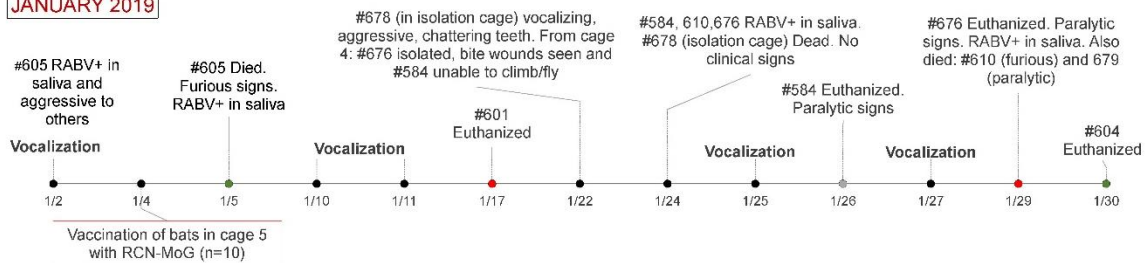

Supplement: s1 [file s1]
